# *Legionella pneumophila* multiplication is enhanced by chronic AMPK signalling in mitochondrially diseased Dictyostelium cells

Lisa Francione, Paige K. Smith, Sandra L. Accari, Philip E. Taylor, Paul B. Bokko, Salvatore Bozzaro, Peter L. Beech and Paul R. Fisher

There was an error in the first ePress version of the article *Dis. Model. Mech.* 2, 479-489.

In the ePress version of 28 July 2009, the Clinical issue section of the Translational Impact text had a missing word, which altered the meaning. The correct sentence should read: 'In many cases, the precise genetic defect causing mitochondrial dysfunction is known, but the downstream pathological outcomes for the mitochondrially diseased cell remain poorly understood.' The correct version was published on ePress on 30 July 2009. The print version is correct.

We apologise for this mistake.
